# Supplementary material
Source: PubMed Central journal article supplement (PMC3945864)
Supplement: supp_blood-2013-11-539098_Document1.pdf [file supp_blood-2013-11-539098_Document1.pdf]

# ***JAK2* or *CALR* mutation status defines subtypes of essential thrombocythemia with substantially different clinical course and outcomes**

by Elisa Rumi, Daniela Pietra et al

## **Supplemental Methods and Tables**

### **Supplemental Methods**

#### Diagnosis of *JAK2* mutated polycythemia vera according to the criteria of the British Committee for Standards in Hematology

Diagnosis of *JAK2* mutated polycythemia vera requires both of the following 2 criteria to be present: 1) high hematocrit (>0.52 in men, >0.48 in women) or raised red cell mass (>25% above predicted); 2) mutation in *JAK2*, i.e., *JAK2* (V617F) or mutation of exon 12. These criteria are very similar to the major criteria of the WHO classification, which considers hemoglobin level (>18.5 g/dL in men, >16.5 g/dL in women, or other evidence of increased red cell mass) instead of hematocrit. The only difference is that the WHO classification requires, in addition to the two major criteria, at least one minor criterion (bone marrow biopsy showing hypercellularity, serum erythropoietin below the normal range, or endogenous erythroid colony formation in vitro).

In order to assess polycythemic transformation of essential thrombocythemia, we adopted the criteria of the British Committee for Standards in Hematology since sequential evaluations of bone marrow biopsy were not available in most patients.

#### References

1. McMullin MF, Bareford D, Campbell P, et al. Guidelines for the diagnosis, investigation and management of polycythaemia/erythrocytosis. *Br J Haematol*. 2005;130(2):174-195.
2. McMullin MF, Reilly JT, Campbell P, et al. Amendment to the guideline for diagnosis and investigation of polycythaemia/erythrocytosis. *Br J Haematol*. 2007;138(6):821-822.

### Sanger sequencing of CALR exon 9

The following M13-tagged primers were used for PCR

- Forward 5'-tgtaaacgacggccagtAAGCAAGGGCTATCGGGTAT-3'

- Reverse 5'-caggaaacagctatgaccAACCAAATCCACCCCAAAT-3'

and for sequencing

- Forward 5'-TGTA AACGACGGCCAGT-3'.

**Supplemental Table 1.** Patients studied in the present work in the analyses of genotype/phenotype relationships and clinical outcomes.

| Myeloproliferative neoplasm                                                     | JAK2 (V617F) mutated (%) | CALR exon 9 mutated (%) | JAK2/MPL/CALR wild-type (%) | All genotypes |
|---------------------------------------------------------------------------------|--------------------------|-------------------------|-----------------------------|---------------|
|                                                                                 |                          |                         |                             |               |
| <i>Patients belonging to the initial patient population</i>                     |                          |                         |                             |               |
|                                                                                 |                          |                         |                             |               |
| Essential thrombocythemia                                                       | 466                      | 176                     | 75                          | 717           |
|                                                                                 |                          |                         |                             |               |
| Polycythemia vera                                                               | 468                      | -                       | -                           | 468           |
|                                                                                 |                          |                         |                             |               |
| All patients with PV or ET                                                      |                          |                         |                             | 1185          |
|                                                                                 |                          |                         |                             |               |
| <i>Patients with secondary myelofibrosis evaluated for mutant allele burden</i> |                          |                         |                             |               |
|                                                                                 |                          |                         |                             |               |
| Post-ET myelofibrosis                                                           | 18                       | 10                      |                             | 28            |
|                                                                                 |                          |                         |                             |               |
| Post-PV myelofibrosis                                                           | 55                       |                         |                             | 55            |
|                                                                                 |                          |                         |                             |               |
| All patients with secondary myelofibrosis                                       |                          |                         |                             | 83            |
|                                                                                 |                          |                         |                             |               |
| <i>Total no.</i>                                                                |                          |                         |                             | <i>1268</i>   |
|                                                                                 |                          |                         |                             |               |

**Supplemental Table 2.** Type and frequency of *CALR* mutations in patients with essential thrombocythemia with nonmutated *JAK2* and *MPL*. The nomenclature adopted here is that of Klampfl et al [N Engl J Med. 2013 Dec 19;369(25):2379-90. Epub 2013 Dec 10].

| <i>CALR</i> mutation                | Nucleotide              | Change                                                                                      | Frequency |      |
|-------------------------------------|-------------------------|---------------------------------------------------------------------------------------------|-----------|------|
|                                     |                         |                                                                                             | No.       | %    |
| Type 1                              | c.1092_1143del          | AAEKQMKDKQDEEQRTRRMMRTKMRMRMRRTRRKMRRKMSPARPRTSCREACLQGWTEA-                                | 81        | 46.0 |
| Type 2                              | c.1154_1155insTTGTC     | AAEKQMKDKQDEEQRLKEEEDKRRKEEEEAE <del>DN</del> CRRMMRTKMRMRMRRTRRKMRRKMSPARPRTSCREACLQGWTEA- | 67        | 38.1 |
| Type 3                              | c.1095_1140del          | AAEKQMKDKQDEEQRQRTRRRMMRTKMRMRMRRTRRKMRRKMSPARPRTSCREACLQGWTEA-                             | 2         | 1.1  |
| Type 4                              | c.1102_1135del          | AAEKQMKDKQDEEQRLRRRQRTRRRMMRTKMRMRMRRTRRKMRRKMSPARPRTSCREACLQGWTEA-                         | 4         | 2.3  |
| Type 5                              | c.1091_1142del          | AAEKQMKDKQDEGQRTRRRMMRTKMRMRMRRTRRKMRRKMSPARPRTSCREACLQGWTEA-                               | 2         | 1.1  |
| Type 6                              | c.1094_1139del          | AAEKQMKDKQDEERRQRTRRRMMRTKMRMRMRRTRRKMRRKMSPARPRTSCREACLQGWTEA-                             | 1         | 0.6  |
| Type 8                              | c.1104_1137del          | AAEKQMKDKQDEEQRLKRRQRTRRRMMRTKMRMRMRRTRRKMRRKMSPARPRTSCREACLQGWTEA-                         | 1         | 0.6  |
| Type 9                              | c.1140del               | AAEKQMKDKQDEEQRLKEEEDKRRKEEERQTRRRMMRTKMRMRMRRTRRKMRRKMSPARPRTSCREACLQGWTEA-                | 2         | 1.1  |
| Type 10                             | c.1154delinsTGTGTC      | AAEKQMKDKQDEEQRLKEEEDKRRKEEEEAE <del>DM</del> CRRMMRTKMRMRMRRTRRKMRRKMSPARPRTSCREACLQGWTEA- | 1         | 0.6  |
| Type 13                             | c.1100_1134delinsA      | AAEKQMKDKQDEEQRQRTRRRMMRTKMRMRMRRTRRKMRRKMSPARPRTSCREACLQGWTEA-                             | 1         | 0.6  |
| Type 16                             | c.1102_1137delinsCA     | AAEKQMKDKQDEEQRLQRRQRTRRRMMRTKMRMRMRRTRRKMRRKMSPARPRTSCREACLQGWTEA-                         | 1         | 0.6  |
| Type 18                             | c.1104_1155del          | AAEKQMKDKQDEEQRLKRRMMRTKMRMRMRRTRRKMRRKMSPARPRTSCREACLQGWTEA-                               | 1         | 0.6  |
| Type 20                             | c.1118_1136del          | AAEKQMKDKQDEEQRLKEEEDGRRQRTRRRMMRTKMRMRMRRTRRKMRRKMSPARPRTSCREACLQGWTEA-                    | 1         | 0.6  |
| Type 21                             | c.1118_1145delinsCGTTTA | AAEKQMKDKQDEEQRLKEEEDALRGQGG-                                                               | 1         | 0.6  |
| Type 22                             | c.1120_1123del          | AAEKQMKDKQDEEQRLKEEEDNAKRRRRQRTRRRMMRTKMRMRMRRTRRKMRRKMSPARPRTSCREACLQGWTEA-                | 1         | 0.6  |
| Type 28                             | c.1131_1152del          | AAEKQMKDKQDEEQRLKEEEDKRRKRRMMRTKMRMRMRRTRRKMRRKMSPARPRTSCREACLQGWTEA-                       | 1         | 0.6  |
| Type 32                             | c.1153_1154delinsTGTC   | AAEKQMKDKQDEEQRLKEEEDKRRKEEEEAE <del>DC</del> RRRMMRTKMRMRMRRTRRKMRRKMSPARPRTSCREACLQGWTEA- | 1         | 0.6  |
| Type 34                             | c.1154_delinsCTTGTC     | AAEKQMKDKQDEEQRLKEEEDKRRKEEEEAE <del>TC</del> RRRMMRTKMRMRMRRTRRKMRRKMSPARPRTSCREACLQGWTEA- | 1         | 0.6  |
| Type 36                             | c.1155_1156insTGTCG     | AAEKQMKDKQDEEQRLKEEEDKRRKEEEEAE <del>DK</del> CRRMMRTKMRMRMRRTRRKMRRKMSPARPRTSCREACLQGWTEA- | 2         | 1.1  |
| Type 37 <sup>§</sup>                | c.1091-1124del          | AAEKQMKDKQDEDAKRRRRQRTRRRMMRTKMRMRMRRTRRKMRRKMSPARPRTSCREACLQGWTEA-                         | 1         | 0.6  |
| Type 38 <sup>§</sup>                | c.1101-1152del          | AAEKQMKDKQDEEQRLRRMMRTKMRMRMRRTRRKMRRKMSPARPRTSCREACLQGWTEA-                                | 1         | 0.6  |
| Type 39 <sup>§</sup>                | c.1109-1145del          | AAEKQMKDKQDEEQRLKEERTRRMMRTKMRMRMRRTRRKMRRKMSPARPRTSCREACLQGWTEA-                           | 1         | 0.6  |
| Type 40 <sup>§</sup>                | c.1113A>C;1122-1140del  | AAEKQMKDKQDEEQRLKEEDEDKRRQRTRRRMMRTKMRMRMRRTRRKMRRKMSPARPRTSCREACLQGWTEA-                   | 1         | 0.6  |
| Total                               |                         |                                                                                             | 176       | 100  |
| <i>Wild-type reference sequence</i> |                         | AAEKQMKDKQDEEQRLKEEEDKRRKEEEEAE <del>DK</del> EDEDKDEDEDEEDKEEDEEDVPGQAKDEL-                |           |      |

\* The aminoacid sequence starting from codon A352 is reported. Acid and basic residues are in red and blue, respectively.

<sup>§</sup> Novel *CALR* mutations with respect to *CALR* abnormalities described in the original report by Klampfl et al [N Engl J Med. 2013 Dec 19;369(25):2379-90. Epub 2013 Dec 10].
